# Supplementary material for: Unusual carbon–sulfur bond cleavage in the reaction of a new type of bulky hexathioether with a zerovalent palladium complex
Source: Royal Society of Chemistry journal article supplement (doi:10.1039/b513339d), 2005-11-21
Supplement: b513339d.pdf [file b513339d.pdf]

## Electronic Supplementary Information for:

### Unusual Carbon-Sulfur Bond Cleavage in the Reaction of a New Type of Bulky Hexathioether with a Zerovalent Palladium Complex

Daisuke Shimizu, Nobuhiro Takeda, and Norihiro Tokitoh\*

*Institute for Chemical Research, Kyoto University, Uji, Kyoto 611-0011, Japan.*

*E-mail: tokitoh@boc.kuicr.kyoto-u.ac.jp*

#### Experimental Section

**General Procedures.** All reactions were carried out under an argon atmosphere, unless otherwise noted.  $^1\text{H}$  NMR (300 MHz),  $^{13}\text{C}$  NMR (75 MHz), and  $^{31}\text{P}$  NMR (121 ppm) spectra were measured in  $\text{CDCl}_3$  with a JEOL AL-300 spectrometer. The  $^1\text{H}$  NMR chemical shifts were reported in ppm downfield from tetramethylsilane ( $\delta$  scale) and referenced to the internal residual  $\text{CHCl}_3$  (7.25 ppm). The  $^{13}\text{C}$  NMR chemical shifts were reported in ppm downfield from tetramethylsilane ( $\delta$  scale) and referenced to the carbon-13 signals of  $\text{CDCl}_3$  (77.0 ppm). Multiplicity of signals in  $^{13}\text{C}$  NMR spectra was determined by DEPT techniques. The  $^{31}\text{P}$  NMR chemical shifts were referenced to the external standards 85%  $\text{H}_3\text{PO}_4$  in water (0 ppm). Preparative gel permeation liquid chromatography (GPLC) was performed on an LC-908 or LC-918 instrument (Japan Analytical Industry Co., Ltd.) equipped with JAI gel 1H+2H columns using chloroform or toluene as an eluent. Column chromatography was performed with Nacalai Tesque Silica Gel 60. High-resolution mass spectral data were obtained on a JEOL JMS-700 spectrometer. All melting points were determined on Yanaco micro melting point apparatus and are uncorrected. Elemental analyses were performed by the Microanalytical Laboratory of the Institute for Chemical Research, Kyoto University.

**Synthesis of hexathioether (1).** To a suspension of 1,2-benzenedithiol (437 mg, 3.07 mmol) and  $\text{Cu}_2\text{O}$  (293 mg, 2.05 mmol) in 2,4,6-trimethylpyridine (30 mL) was added dropwise a solution of  $\text{TbtSC}_6\text{H}_4\text{I}^1$  (1.61 g, 2.05 mmol) in 2,4,6-trimethylpyridine (20 mL) at 170 °C. The mixture was refluxed for 3 h under argon to generate intermediate **3**, and stirred for further 12 h at room temperature under the air. The reaction mixture was passed through a short column ( $\text{SiO}_2$ , benzene) to remove inorganic salts. After addition of benzene (200 mL), the mixture was washed with a 0.2 M aqueous solution of HCl three times (100 mL  $\times$  3). The organic layer was dried with  $\text{MgSO}_4$  and the solvents were removed under reduced pressure to afford a light yellow oil. The residue was subjected to GPLC ( $\text{CHCl}_3$ ) followed by the reprecipitation from  $\text{CHCl}_3$  and  $\text{CH}_3\text{CN}$  solution to give hexathioether **1** (1.50 g, 0.93 mmol, 93%) as colorless crystals. **1**: Mp: 188.0–189.0 °C.  $^1\text{H}$  NMR (300 MHz,  $\text{CDCl}_3$ ):  $\delta$  0.03 (s, 72H,  $\text{SiMe}_3$ ), 0.07 (s, 36H,  $\text{SiMe}_3$ ), 1.38 (s, 2H, Tbt *p*-benzyl), 2.66 (s, 4H, Tbt *o*-benzyl), 6.42 (s, 2H), 6.57 (s, 2H), 6.63–6.68 (m, 2H), 6.92–7.01 (m, 6H), 7.08–7.24 (m, 4H), 7.29 (dd,  $J = 1.4, 7.4$  Hz, 2H), 7.56 (dd,  $J = 1.4, 8.0$  Hz, 2H);  $^{13}\text{C}$  NMR (75 MHz,  $\text{CDCl}_3$ ):  $\delta$  0.7 (q,  $\text{SiMe}_3$ ), 0.9 (q,  $\text{SiMe}_3$ ), 26.5 (d  $\times$  2, Tbt *o*-benzyl), 30.6 (d, Tbt *p*-benzyl), 122.6 (d), 123.9

(s), 125.0 (d), 126.6 (d), 127.0 (d), 127.0 (d), 127.3 (d), 127.7 (d), 128.9 (d), 130.0 (d), 131.8 (s), 131.8 (s), 133.6 (d), 139.8 (s), 140.1 (s), 144.5 (s), 150.3 (s × 2); HRMS (FAB): found  $m/z$  1598.5974 ( $[M]^+$ ), calcd for  $C_{78}H_{134}S_6Si_{12}$  1598.6041; Anal. Calcd for  $C_{78}H_{134}S_6Si_{12}$ : C, 58.50; H, 8.43. Found: C, 58.44; H, 8.52.

**In the case of the oxidization with I<sub>2</sub> instead of air-oxidization.**

After the generation of intermediate **3** by the above-mentioned method, to the reaction mixture was added a small excess of iodine, and the mixture was subsequently stirred for 3 h at room temperature under argon atmosphere. The reaction mixture was passed through a short column (SiO<sub>2</sub>, benzene) to remove inorganic salts. After the addition of benzene, the mixture was washed with a 0.6 M aqueous solution of Na<sub>2</sub>S<sub>2</sub>O<sub>3</sub> before washing with a 0.2 M aqueous solution of HCl three times. The organic layer was dried with MgSO<sub>4</sub> and the solvents were removed under reduced pressure to afford a light yellow oil. The residue was subjected to GPLC (CHCl<sub>3</sub>) followed by the reprecipitation from CHCl<sub>3</sub> and CH<sub>3</sub>CN solution to give hexathioether **1** as colorless crystals.

**Synthesis of trinuclear Pd complex (4).** To a benzene solution (5 mL) of hexathioether **1** (30 mg, 18.7 μmol) was added 3 molar amounts of tetrakis(triphenylphosphine) palladium(0) (64.9 mg, 56.1 μmol) at room temperature. After stirring of the mixture for 62 h at the same temperature, the solvent was removed under reduced pressure. The residue was dissolved into CHCl<sub>3</sub> (15 mL) and the brown suspension was filtered through Celite<sup>®</sup>. The filtrate was evaporated and the residual brown solid was subjected to GPLC (CHCl<sub>3</sub>) followed by silica gel column chromatography (benzene:hexane = 1:1) to give pure tripalladium complex **4** (26.5 mg, 10.8 μmol, 58%) as yellow crystals. **4**: Mp: 182.7–183.7 °C (decomp). <sup>1</sup>H NMR (300 MHz, CDCl<sub>3</sub>, 50 °C): δ -0.22 (s, 18H, SiMe<sub>3</sub>), -0.19 (s, 18H, SiMe<sub>3</sub>), 0.08 (s, 18H, SiMe<sub>3</sub>), 0.09 (s, 36H, SiMe<sub>3</sub>), 0.16 (s, 18H, SiMe<sub>3</sub>), 1.38 (s, 2H, Tbt *p*-benzyl), 2.53 (s, 2H, Tbt *o*-benzyl), 3.30 (s, 2H, Tbt *o*-benzyl), 5.11 (d, <sup>3</sup>J = 7.8 Hz, 2H), 5.80–5.94 (m, 4H), 5.97 (ddd, <sup>3</sup>J = 7.8, ~8.0 Hz, <sup>4</sup>J = 1.5 Hz, 2H), 6.10–6.19 (m, 4H), 6.17–6.22 (m, 2H), 6.53 (ddd, <sup>3</sup>J = 7.2, ~8.0 Hz, <sup>4</sup>J = 1.5 Hz, 2H), 6.58 (s, 2H), 6.66 (s, 2H), 7.09–7.26 (m, 18H), 7.44–7.91 (m, 12H); <sup>13</sup>C NMR (75 MHz, CDCl<sub>3</sub>, 50 °C): δ 0.8 (q, SiMe<sub>3</sub>), 0.9 (q, SiMe<sub>3</sub>), 1.5 (q, SiMe<sub>3</sub>), 2.0 (q, SiMe<sub>3</sub>), 26.4 (d, Tbt *p*-benzyl), 27.1 (d, Tbt *o*-benzyl), 30.8 (d, Tbt *o*-benzyl), 122.0 (d), 122.5 (d), 122.6 (d), 123.8 (d), 124.6 (d), 125.5 (s), 128.1 (d), 128.3 (d), 130.3 (d), 131.7 (d), 134.4 (d × 2), 134.7 (s), 136.2 (d), 136.3 (d), 142.1 (s), 143.4 (s), 143.8 (s), 146.0 (s), 150.4 (s), 151.9 (s), 152.5 (s); <sup>31</sup>P NMR (121 MHz, CDCl<sub>3</sub>, 50 °C): δ 28.1; Anal. Calcd for C<sub>114</sub>H<sub>164</sub>P<sub>2</sub>Pd<sub>3</sub>S<sub>6</sub>Si<sub>12</sub>: C, 56.00; H, 6.76. Found: C, 55.98; H, 6.83.

**X-Ray structural analysis of 1·0.5(CH<sub>2</sub>Cl<sub>2</sub>)·0.5(C<sub>6</sub>H<sub>14</sub>) and 4·3.2(C<sub>6</sub>H<sub>6</sub>)·0.8(CHCl<sub>3</sub>).** Single crystals of 1·0.5(CH<sub>2</sub>Cl<sub>2</sub>)·0.5(C<sub>6</sub>H<sub>14</sub>) and 4·3.2(C<sub>6</sub>H<sub>6</sub>)·0.8(CHCl<sub>3</sub>) suitable for X-ray structural analysis were obtained by slow recrystallization from CH<sub>2</sub>Cl<sub>2</sub>/C<sub>6</sub>H<sub>14</sub> and CHCl<sub>3</sub>/C<sub>6</sub>H<sub>6</sub>, respectively. The crystals were mounted on a glass fiber. The intensity data were collected on Rigaku/MSC Mercury CCD diffractometer with graphite monochromated Mo Kα radiation (λ = 0.71070 Å for 1·0.5(CH<sub>2</sub>Cl<sub>2</sub>)·0.5(C<sub>6</sub>H<sub>14</sub>) and λ = 0.71069 Å for 4·3.2(C<sub>6</sub>H<sub>6</sub>)·0.8(CHCl<sub>3</sub>)). The structures were solved by direct methods (SIR-97)<sup>2</sup>, and refined by

full-matrix least-squares procedures on  $F^2$  for all reflections (SHELXL-97).<sup>3</sup> The solvated dichloromethane was disordered and their occupancies were refined (0.50:0.50) in  $1 \cdot 0.5(\text{CH}_2\text{Cl}_2) \cdot 0.5(\text{C}_6\text{H}_{14})$ . In the crystal of  $4 \cdot 3.2(\text{C}_6\text{H}_6) \cdot 0.8(\text{CHCl}_3)$ , some molecules of **4** are solvated by two benzene molecules and others are solvated by one benzene and one chloroform molecules. The occupancies of one of the benzene molecules and the chloroform molecule were refined (0.60:0.40). All the non-hydrogen atoms, except for the carbon atom of solvated dichloromethane in  $1 \cdot 0.5(\text{CH}_2\text{Cl}_2) \cdot 0.5(\text{C}_6\text{H}_{14})$ , were refined anisotropically. All hydrogens were placed using AFIX instructions. The structural data are shown in Table 1. In the analysis of  $1 \cdot 0.5(\text{CH}_2\text{Cl}_2) \cdot 0.5(\text{C}_6\text{H}_{14})$ , there are the highest peak (1.554 e  $\text{\AA}^{-3}$ ) and the deepest hole (-1.242 e  $\text{\AA}^{-3}$ ) near to the  $\text{CH}_2\text{Cl}_2$  solvent molecule due to disorders that could no be completely dissolved.

Table 1. Crystal Data and Refinement Details for  $1 \cdot 0.5(\text{CH}_2\text{Cl}_2) \cdot 0.5(\text{C}_6\text{H}_{14})$  and  $4 \cdot 3.2(\text{C}_6\text{H}_6) \cdot 0.8(\text{CHCl}_3)$

|                                                     | $1 \cdot 0.5(\text{CH}_2\text{Cl}_2) \cdot 0.5(\text{C}_6\text{H}_{14})$ | $4 \cdot 3.2(\text{C}_6\text{H}_6) \cdot 0.8(\text{CHCl}_3)$                                |
|-----------------------------------------------------|--------------------------------------------------------------------------|---------------------------------------------------------------------------------------------|
| empirical formula                                   | $\text{C}_{81.50}\text{H}_{142}\text{ClS}_6\text{Si}_{12}$               | $\text{C}_{134}\text{H}_{184}\text{Cl}_{2.40}\text{P}_2\text{Pd}_3\text{S}_6\text{Si}_{12}$ |
| formula weight                                      | 1686.84                                                                  | 2790.47                                                                                     |
| temperature                                         | 103(2) K                                                                 | 103(2) K                                                                                    |
| crystal system                                      | triclinic                                                                | monoclinic                                                                                  |
| space group                                         | $P-1$ (# 2)                                                              | $C2/c$ (#15)                                                                                |
| $a$ (Å)                                             | 10.920(2)                                                                | 31.9316(5)                                                                                  |
| $b$ (Å)                                             | 20.424(5)                                                                | 24.7082(6)                                                                                  |
| $c$ (Å)                                             | 23.068(5)                                                                | 24.0157(5)                                                                                  |
| $\alpha$ (deg)                                      | 71.290(7)                                                                | 90                                                                                          |
| $\beta$ (deg)                                       | 83.335(10)                                                               | 130.2043(8)                                                                                 |
| $\gamma$ (deg)                                      | 83.675(11)                                                               | 90                                                                                          |
| $V$ (Å <sup>3</sup> )                               | 4825.5(18)                                                               | 14471.3(5)                                                                                  |
| $Z$                                                 | 2                                                                        | 4                                                                                           |
| $D_{\text{calc}}$ (Mg m <sup>-3</sup> )             | 1.161                                                                    | 1.281                                                                                       |
| absorp coeff (mm <sup>-1</sup> )                    | 0.357                                                                    | 0.666                                                                                       |
| crystal size (mm)                                   | 0.30 × 0.10 × 0.01                                                       | 0.30 × 0.10 × 0.10                                                                          |
| $\theta$ range                                      | 2.35 to 25.00°                                                           | 2.95 to 25.00°                                                                              |
| no. of reflns measd                                 | 31210                                                                    | 47590                                                                                       |
| no. of indep reflns                                 | 16506                                                                    | 12714                                                                                       |
| $R_{\text{int}}$                                    | 0.0454                                                                   | 0.0758                                                                                      |
| completeness                                        | 97.20%                                                                   | 99.70%                                                                                      |
| data/restraints/parameters                          | 16506 / 0 / 941                                                          | 12714 / 63 / 769                                                                            |
| goodness-of-fit on $F^2$                            | 1.081                                                                    | 1.058                                                                                       |
| final $R$ indices [ $I > 2\sigma(I)$ ] <sup>a</sup> | $R_1 = 0.0647$<br>$wR_2 = 0.1482$                                        | $R_1 = 0.0438$<br>$wR_2 = 0.0841$                                                           |
| $R$ indices (all data) <sup>a</sup>                 | $R_1 = 0.0914$<br>$wR_2 = 0.1661$                                        | $R_1 = 0.0893$<br>$wR_2 = 0.0936$                                                           |
| largest diff. peak and hole (e $\text{\AA}^{-3}$ )  | 1.554 and -1.242                                                         | 1.400 and -0.766                                                                            |

<sup>a</sup>  $R_1 = \Sigma||F_o| - |F_c||/\Sigma|F_o|$ ,  $wR_2 = [(\Sigma w(F_o^2 - F_c^2)^2)/\Sigma w(F_o^2)^2]^{1/2}$ .

## References

1. N. Takeda, D. Shimizu, and N. Tokitoh, *Inorg. Chem.*, in press.

2. A. Altomare, M. C. Burla, M. Camalli, G. L. Cascarano, C. Giacovazzo, A. Guagliardi, A. G. G. Moliterni, G. Polidori, and R. Spagna, *J. Appl. Crystallogr.*, 1999, **32**, 115-119.
3. G. M. Sheldrick, SHELX-97, program for the Refinement of Crystal Structures, University of Göttingen, Göttingen, Germany, 1997.
